# Supplementary material for: Dynamic template directed construction of three-dimensional porous bismuth aerogels for high-rate Na-ion storage
Source: Royal Society of Chemistry journal article supplement (doi:10.1039/d2ta09710a), 2023-01-01
Supplement: d2ta09710a1.pdf [file d2ta09710a1.pdf]

***Supporting Information***

**Dynamic Template Directed Construction of Three-Dimensional  
Porous Bismuth Aerogel for High-Rate Na-Ion Storage**

*Yani Liu<sup>a</sup>, Yu Wang<sup>a</sup>, Haoqiang Wang<sup>a</sup>, Shuming Dou<sup>a</sup>, Huijie Tian<sup>a</sup>, Wei Gan<sup>b</sup>, Qunhui  
Yuan<sup>a,\*</sup>*

*<sup>a</sup>Shenzhen Key Laboratory of Flexible Printed Electronics Technology, School of  
Materials Science and Engineering, Harbin Institute of Technology (Shenzhen),  
Shenzhen 518055, China*

*<sup>b</sup>Shenzhen Key Laboratory of Flexible Printed Electronics Technology, School of  
School of Science, Harbin Institute of Technology (Shenzhen), Shenzhen 518055, China*

\* Corresponding author.

E-mail address: [yuanqunhui@hit.edu.cn](mailto:yuanqunhui@hit.edu.cn) (Q. Yuan)

*Table and Figure*

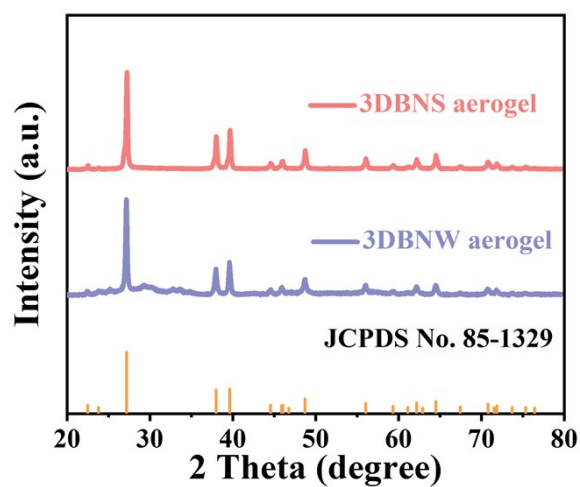

**Figure S1** XRD patterns of 3DBNS, 3DBNW aerogels and Bi standard.

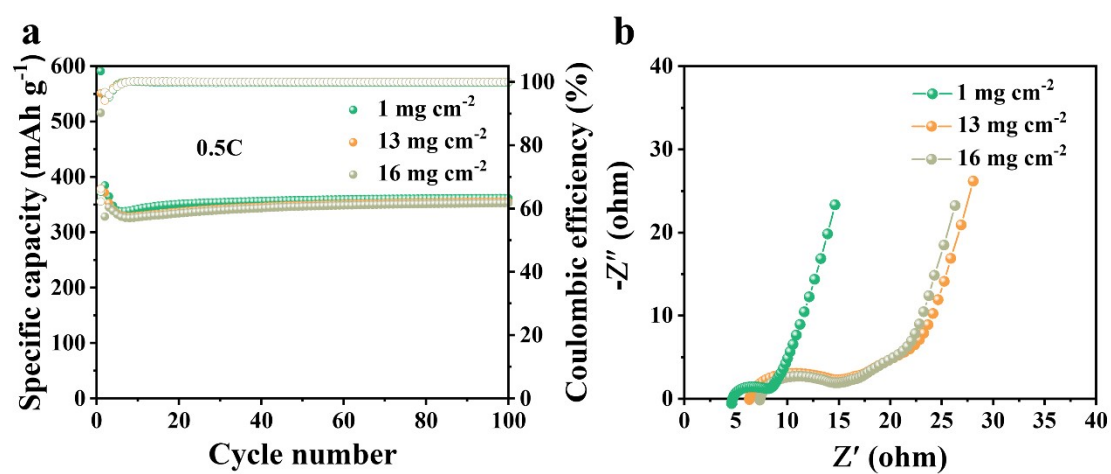

**Figure S2** (a) The specific capacity at 0.5C and (b) Nyquist plots of 3DBS aerogels with different mass loadings of  $\sim 1$ ,  $\sim 13$  and  $\sim 16$   $\text{mg cm}^{-2}$ .

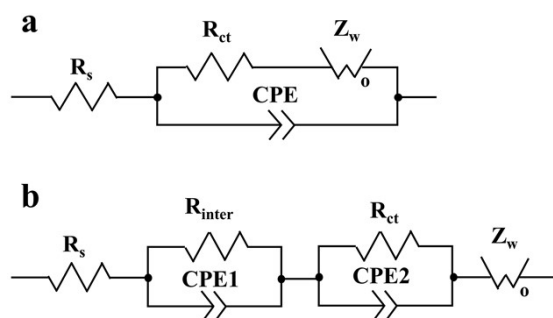

**Figure S3** Equivalent circuit models for 3DBS aerogels with different mass loadings of (a) 1 and (b)  $\sim 13/16$  mg cm<sup>-2</sup>.

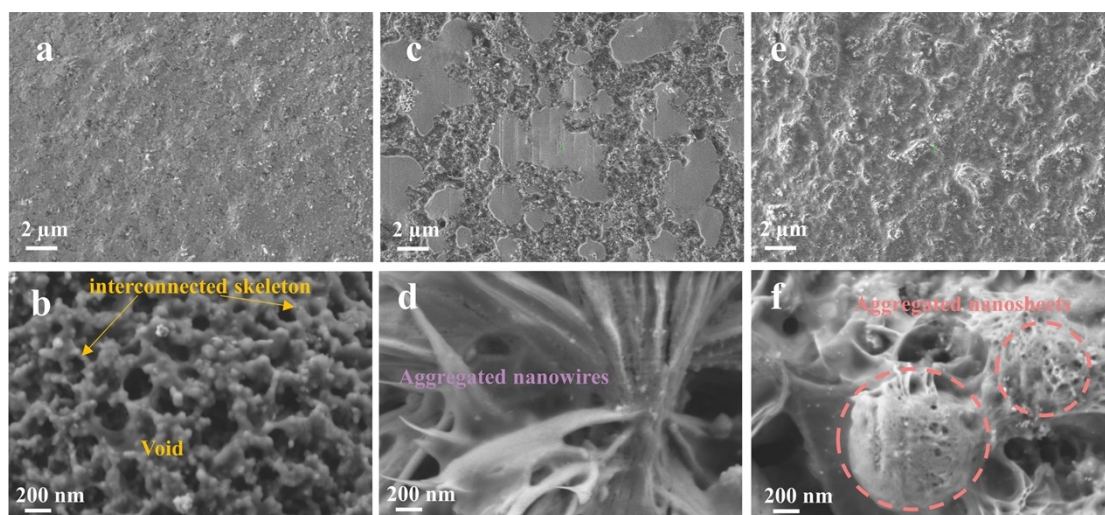

**Figure S4** SEM images of (a, b) 3DBS, (c, d) 3DBNW and (e, f) 3DBNS aerogels.

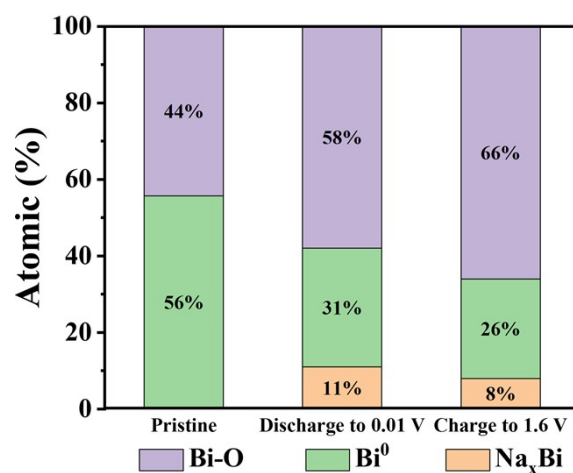

**Figure S5** Contents of Bi<sup>0</sup>, Bi-O and Na<sub>x</sub>Bi at pristine state, after being discharged to 0.01 V and after being charged to 1.6 V.

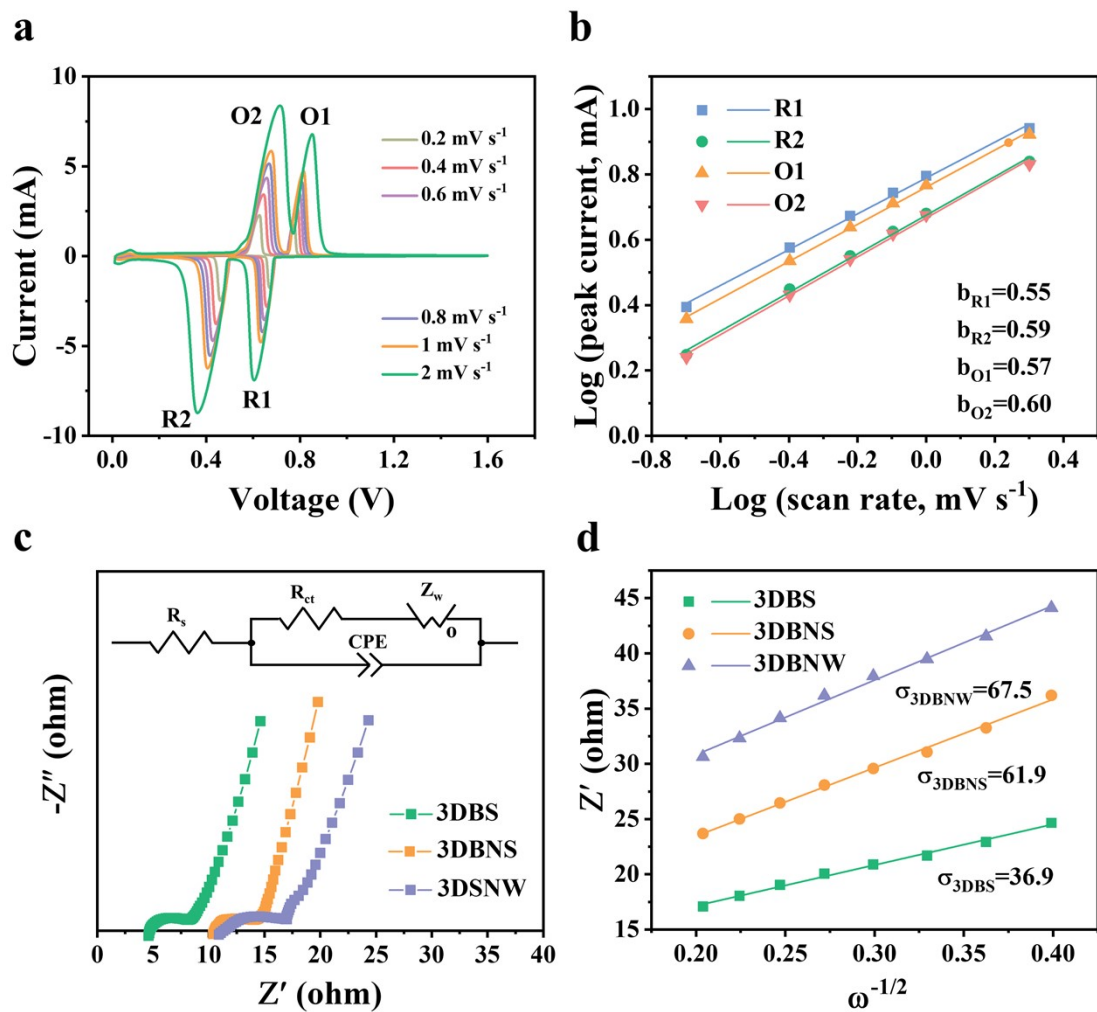

**Figure S6** (a) CV curves of the half-cells based on 3DBS; (b) The  $\log(i)$  vs.  $\log(v)$  curve of the cathodic/anodic peaks; (c) Nyquist plots of 3DBS, 3DBNS and 3DBNW aerogels with a mass loading of  $1 \text{ mg cm}^{-2}$ .

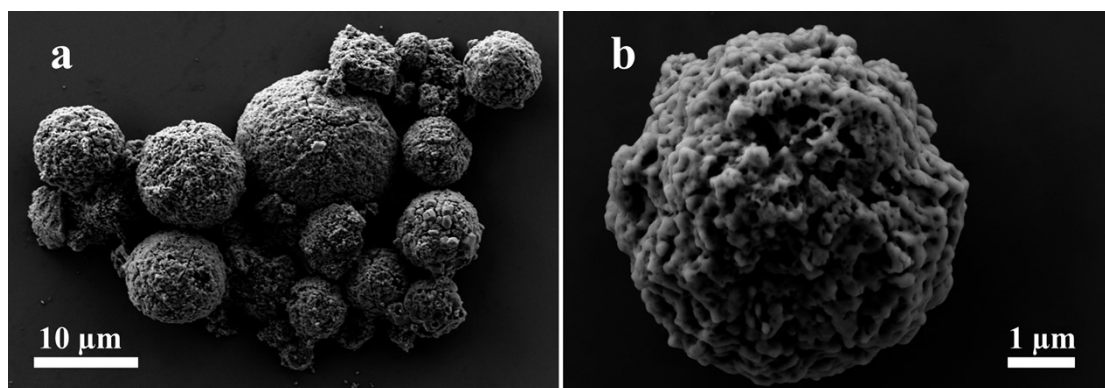

**Figure S7** (a and b) Large scale and high-resolution SEM images of  $\text{Na}_3\text{V}_2(\text{PO}_4)_3$ .

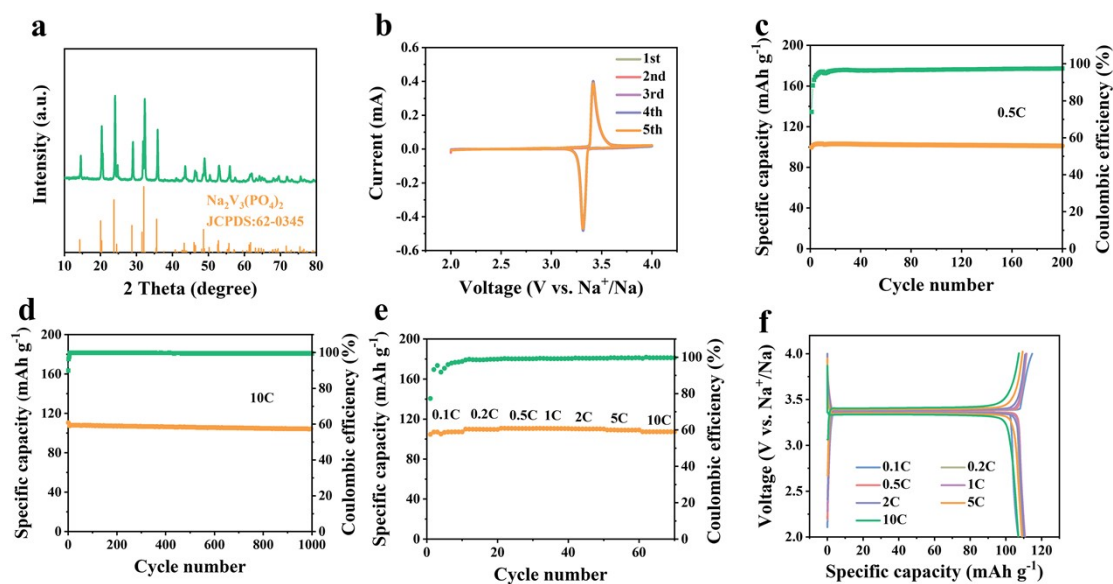

**Figure S8** (a) XRD pattern; (b) CV curves over 2-4.0 V at 0.1 mV s<sup>-1</sup>; (c) Cycling stability at 0.5C; (d) Long-term cycling stability at 10C; (e) Rate performance and (f) Galvanostatic charge/discharge curves of Na<sub>3</sub>V<sub>2</sub>(PO<sub>4</sub>)<sub>3</sub> cathode.

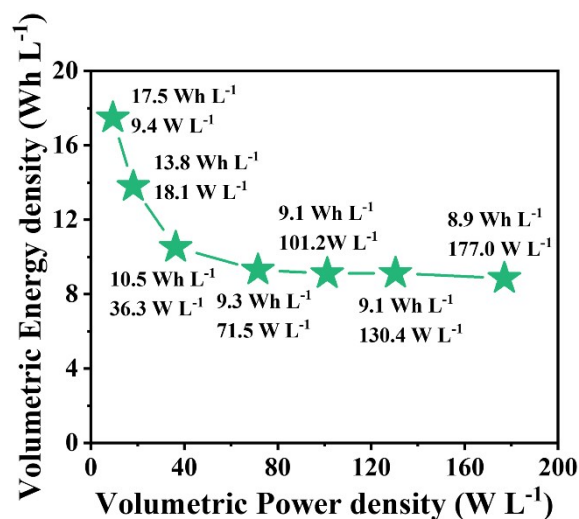

**Figure S9** Volumetric energy density vs. power density curve.

**Table S1** Comparison on specific surface areas and pore volumes of 3DBS, 3DBNW and 3DBNS aerogels.

| <i>Aerogel</i>                                         | <b>3DBS</b> | <b>3DBNW</b> | <b>3DBNS</b> |
|--------------------------------------------------------|-------------|--------------|--------------|
| <i>Specific surface area (<math>m^2 g^{-1}</math>)</i> | 16.64       | 6.49         | 12.27        |
| <i>Pore volume (<math>cm^3 g^{-1}</math>)</i>          | 0.075       | 0.045        | 0.069        |

**Table S2** Half cell performance of Bi-based anodes for Na-ion batteries

| <b>Materials</b> | <b>ICE<sup>a</sup></b> | <b>Cycling performance<sup>b</sup></b> | <b>Rate capacity<sup>c</sup></b> | <b>Electrolyte</b>                | <b>Ref</b> |
|------------------|------------------------|----------------------------------------|----------------------------------|-----------------------------------|------------|
| <i>Bi@C@CFs</i>  | 52.4%/1                | 305(89.4%)/5000th/5                    | 309/80                           | 1M NaPF <sub>6</sub> /<br>EC/DEC  | 20         |
| <i>Bi@C</i>      | -                      | 280(95%)/200th/0.8                     | -                                | 1M NaPF <sub>6</sub> /DME         | 28         |
| <i>Bi@NC</i>     | 63%/1                  | -/2000th/1                             | 220/3                            | 1M NaPF <sub>6</sub> /DME         | 42         |
| <i>Bi@C</i>      | 45%/0.1                | 123.5(-)/100th/0.1                     | 83.4/2                           | 1M NaClO <sub>4</sub> /<br>EC/PC  | 44         |
| <i>Bi@3DGFs</i>  | 36%/0.1                | 208(86.3%)/95th/0.1                    | 180/50                           | 1M NaPF <sub>6</sub> /DME         | 47         |
| <i>FLB-G</i>     | -                      | 317(-)/1000/0.7                        | 263/1                            | 1M NaPF <sub>6</sub> /<br>Diglyme | 48         |
| <i>3DBNW</i>     | 61%/0.5                | 194(58.9%)/300th/0.5                   | 250/30                           | 1M NaPF <sub>6</sub> /<br>Diglyme | This work  |
| <i>3DBNS</i>     | 63%/0.5                | 305(84.96)/300th/0.5                   | 289/30                           | 1M NaPF <sub>6</sub> /<br>Diglyme | This work  |
| <i>3DNS</i>      | 65%/0.5                | 358(93.2%)/300th/0.5                   | 331/30                           | 1M NaPF <sub>6</sub> /<br>Diglyme | This work  |

<sup>a</sup>) The ICE is summarized as ICE/current density (A g<sup>-1</sup>) or (C) used in this work

<sup>b</sup>) The cycling performance is summarized as capacity (mAh g<sup>-1</sup>)(capacity retention)/cycle number/current density (A g<sup>-1</sup>) or (C) used in this work

<sup>c</sup>) The rate capability is summarized as capacity (mAh g<sup>-1</sup>)/current density (A g<sup>-1</sup>) or (C) used in this work

<sup>d</sup>) The common mass loading used in these literatures references is ~1 mg cm<sup>-2</sup>, except for few high loadings of ~2 mg cm<sup>-2</sup> in *Ref. 48* and ~12 mg cm<sup>-2</sup> in *Ref. 28*

**Table S3** Full cell performance with Bi-based anodes for Na-ion batteries

| Full cell cathode//anode | Cycling performance <sup>a</sup> | Rate capacity <sup>b</sup> | Energy density (Wh kg <sup>-1</sup> ) | Mass ratio (cathode: anode) | Ref       |
|--------------------------|----------------------------------|----------------------------|---------------------------------------|-----------------------------|-----------|
| <i>NVP//Bi@NS-C</i>      | 283/140/1                        | 196/10                     | 220                                   | 1:3                         | 15        |
| <i>NVP//Bi@C</i>         | 242/500/1                        | 131/10                     | 144                                   | 4:1                         | 28        |
| <i>NVP//Bi@NC</i>        | 223/200/1                        | 180/5                      | 125                                   | 3.5:1                       | 57        |
| <i>NVP/C//Bi@N-C</i>     | 240/800/1                        | 223/2                      | 119                                   | 1.4:1                       | 58        |
| <i>NVP//3DBS</i>         | 187/1000/5                       | 198/15                     | 236                                   | 4:1                         | This work |

<sup>a</sup>) The cycling performance is summarized as capacity (mAh g<sup>-1</sup>)/cycle number/current density (A g<sup>-1</sup>) or (C) used in this work

<sup>b</sup>) The rate capability is summarized as capacity (mAh g<sup>-1</sup>)/current density (A g<sup>-1</sup>) or (C) used in this work

<sup>c</sup>) The electrolyte used in *Ref. 28* and *57* is 1 M NaPF<sub>6</sub> in DME and the electrolyte used in *Ref. 15*, *Ref. 58* and this work is 1 M NaPF<sub>6</sub> in diglyme
